# Supplementary material for: Dual-mode sensing platform for the detection of multiple metal ions based on amine-functionalized MIL-101 (Fe) Y-shaped DNAzyme-assisted fluorescence and colorimetric analysis
Source: Royal Society of Chemistry journal article supplement (doi:10.1039/d5ay00075k), 2025-01-01
Supplement: d5ay00075k1.pdf [file d5ay00075k1.pdf]

**Dual-mode sensing platform for detection of multiple metal ions based on amine-functionalized MIL-101 (Fe) cascade Y-Shaped DNzyme-assisted fluorescence and colorimetric analysis**

A. Ravikumar<sup>1</sup>, Emmanuel Chigozie Aham<sup>1,2,3</sup>, Hui meng<sup>1</sup>, Sanwal Aslam<sup>1</sup>, A. Arunjegan<sup>1</sup>, G. Tamilselvan<sup>1</sup>, A. Anand babu Christus<sup>4</sup>, Zhen Zhang<sup>1\*</sup>, Hongjun Zhao<sup>5,6\*</sup>

<sup>1</sup>School of the Environment and Safety Engineering, Jiangsu University, Zhenjiang 212013, China.

<sup>2</sup>Department of Biochemistry, Faculty of Biological Sciences, University of Nigeria, Nsukka, Nigeria.

<sup>3</sup>Natural Science Unit, School of General Studies, University of Nigeria, Nsukka, Nigeria.

<sup>4</sup>Department of Chemistry, SRM Institute of Science and Technology, Ramapuram Campus, Chennai-600089, Tamil Nadu, India.

<sup>5</sup>Zhejiang Province Engineering Research Center for Endoscope Instruments and Technology Development, Clinical Research Centre, Department of Pulmonary and Critical Care Medicine,

<sup>6</sup>Quzhou People's Hospital, The Quzhou Affiliated Hospital of Wenzhou Medical University, 100 Minjiang Ave, Quzhou 324000, China.

\*Corresponding author:

Email: [zhangzhen@ujs.edu.cn](mailto:zhangzhen@ujs.edu.cn); [zhaohj\\_1980@163.com](mailto:zhaohj_1980@163.com)

Fax: +86-511-88790955

### **Preparation of Fe<sub>3</sub>O<sub>4</sub> nanoparticles**

3.6g of Sodium acetate and 1.35g of FeCl<sub>3</sub>.6H<sub>2</sub>O were dissolved in ethylene glycol (40 mL) with continuous stirring for 30 min, after 30 min stirring the colour will be change the yellow. The obtained yellow solution was transferred to Teflon-lined stainless-steel autoclave and heated at 200 °C for 8 h. The obtained brownish colour products washed with several times used ethanol and water and then dried in a hot air oven at 60°C at overnight.

### **Synthesis of Fe<sub>3</sub>O<sub>4</sub>@ SiO<sub>2</sub>**

1 mg of Fe<sub>3</sub>O<sub>4</sub> nanoparticles was completely dispersed in 10 mL of ethanol solution, the mixture was sonicated for half an hour. 3 ml of tetraethyl orthosilane (TEOS) was added, and pH was adjusted to upto 10 by addition of ammonium hydroxide and the mixture was stirred for 24 hours. The obtained Fe<sub>3</sub>O<sub>4</sub>@SiO<sub>2</sub> were separated by centrifugation and several times washed with ethanol and distilled water and dried for overnight at 60°C.

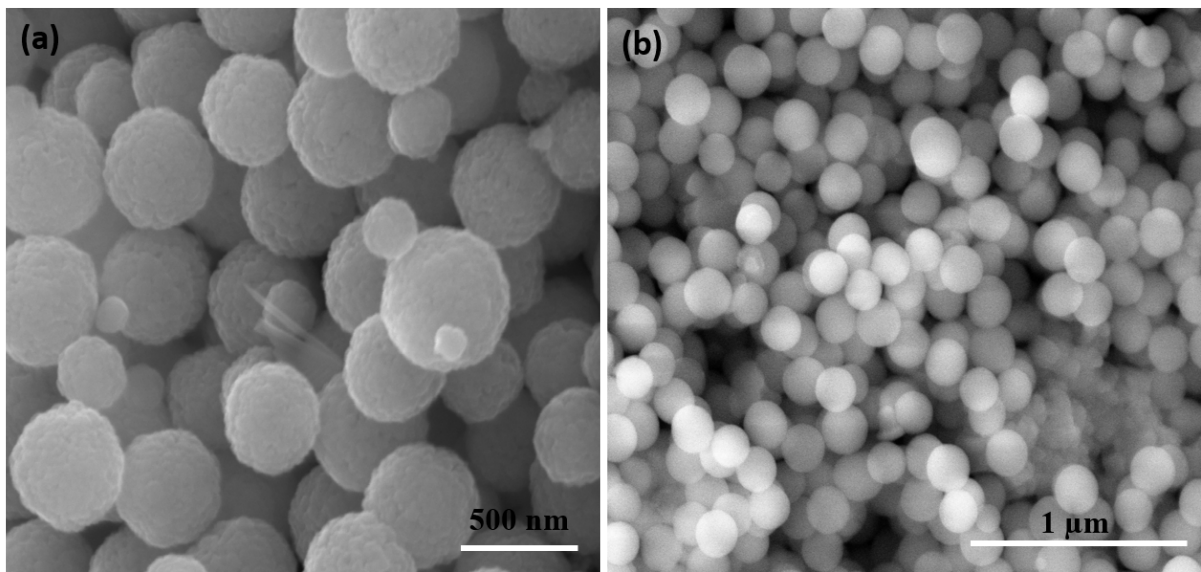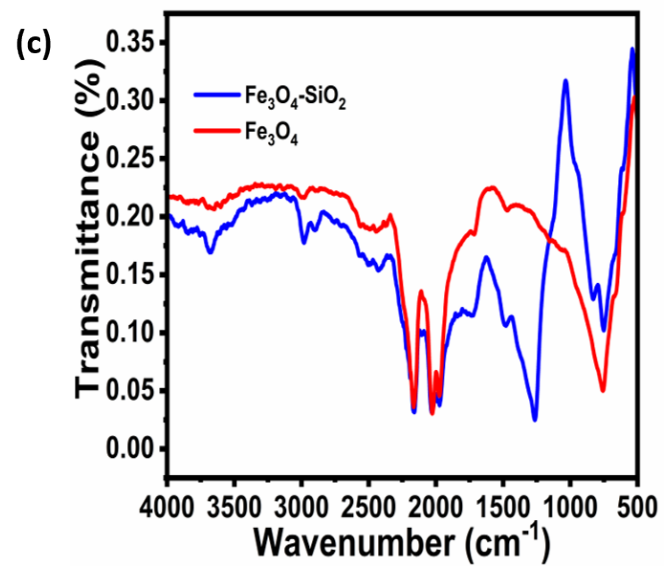

Figure S1. (a) SEM images of  $\text{Fe}_3\text{O}_4$ ; (b) SEM images of  $\text{Fe}_3\text{O}_4@\text{SiO}_2$ ; (c) FT-IR spectra of  $\text{Fe}_3\text{O}_4$  and  $\text{Fe}_3\text{O}_4@\text{SiO}_2$ ;

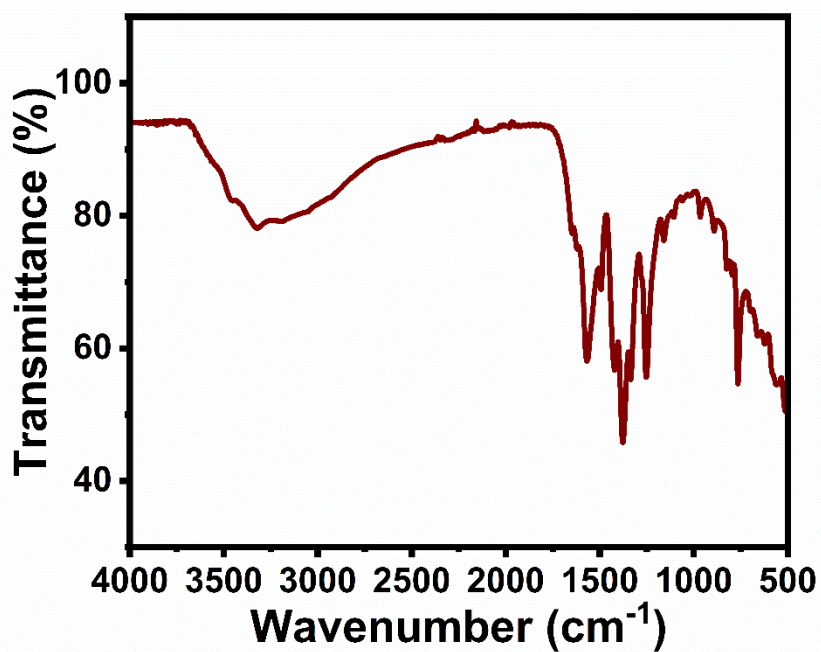

Figure S2. FTIR spectra of  $\text{NH}_2\text{-MIL-101 (Fe)}$ .

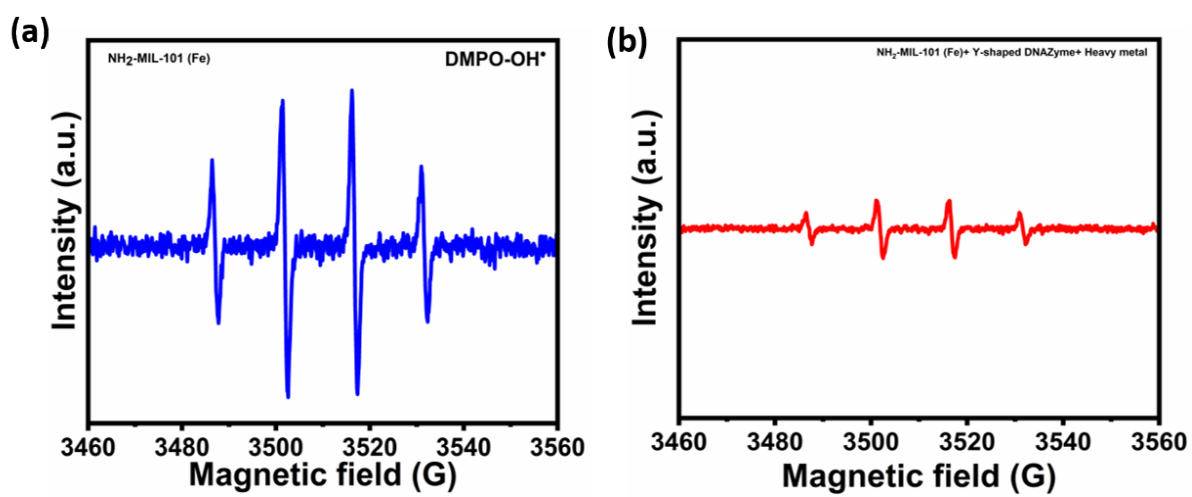

Figure S3. EPR spectra of  $\text{NH}_2\text{-MIL-101 (Fe)}$  and  $\text{NH}_2\text{-MIL-101 (Fe)+Y-Shaped DNAzyme}$  with heavy metals.

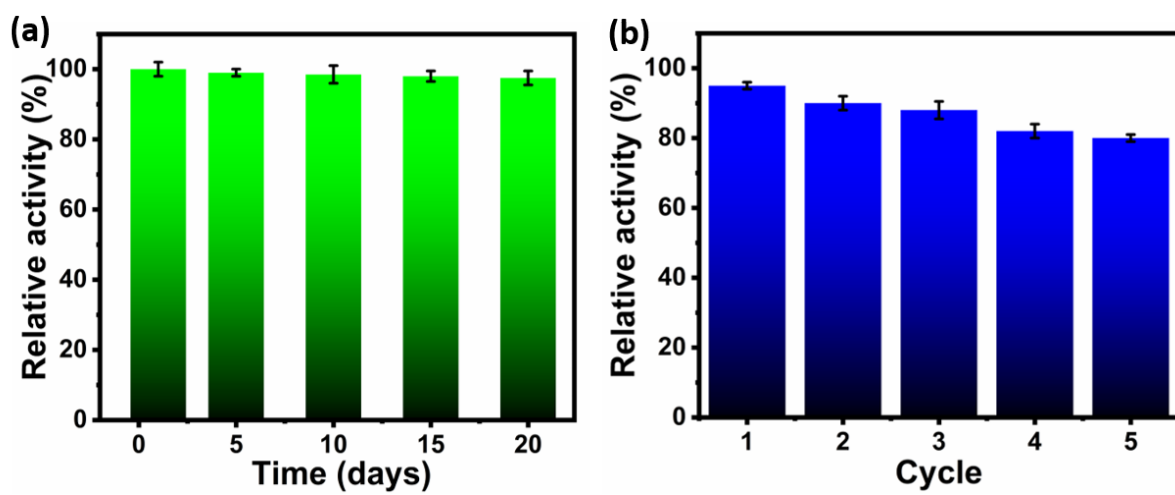

Figure S4. The stability and reproducibility analysis of NH<sub>2</sub>-MIL-101 (Fe).

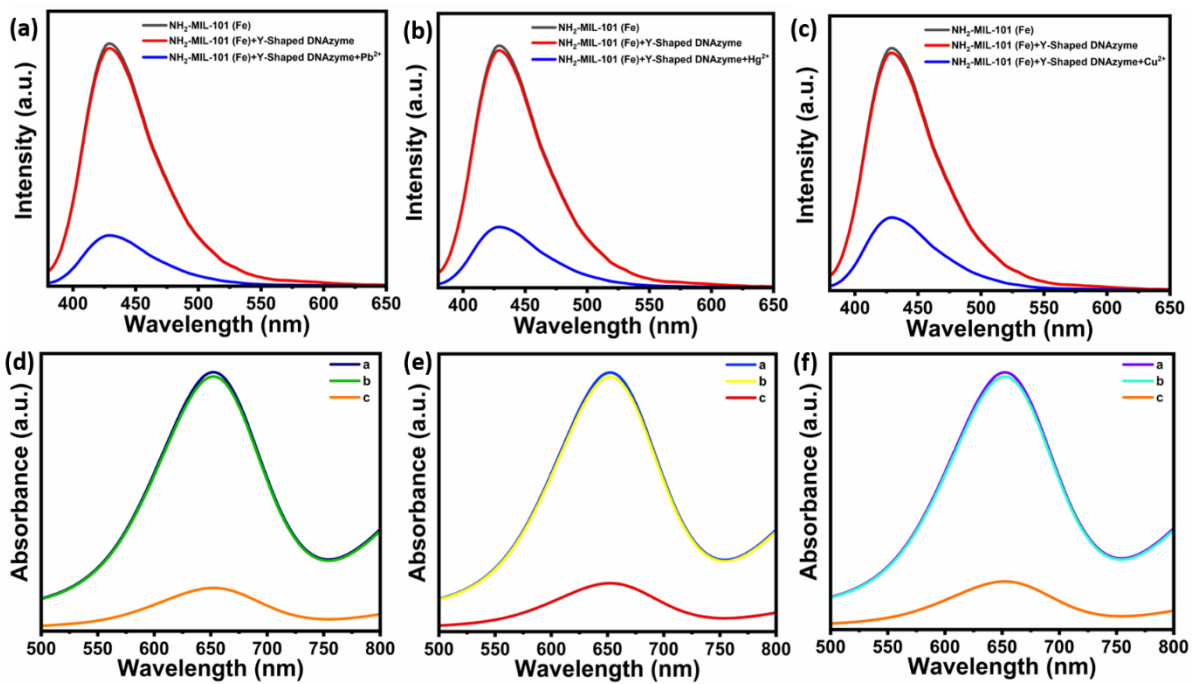

Figure S5. (a, b, c) Fluorescence intensity of  $\text{Pb}^{2+}$ ,  $\text{Hg}^{2+}$  and  $\text{Cu}^{2+}$  ions in various conditions; (d, e, f) UV absorbance intensity of  $\text{Pb}^{2+}$ ,  $\text{Hg}^{2+}$  and  $\text{Cu}^{2+}$  ions in various conditions [a-  $\text{NH}_2$ -MIL-101(Fe), b-  $\text{NH}_2$ -MIL-101(Fe) and Y-shaped DNAzyme, c-  $\text{NH}_2$ -MIL-101(Fe), Y-shaped DNAzyme and target metal ions].

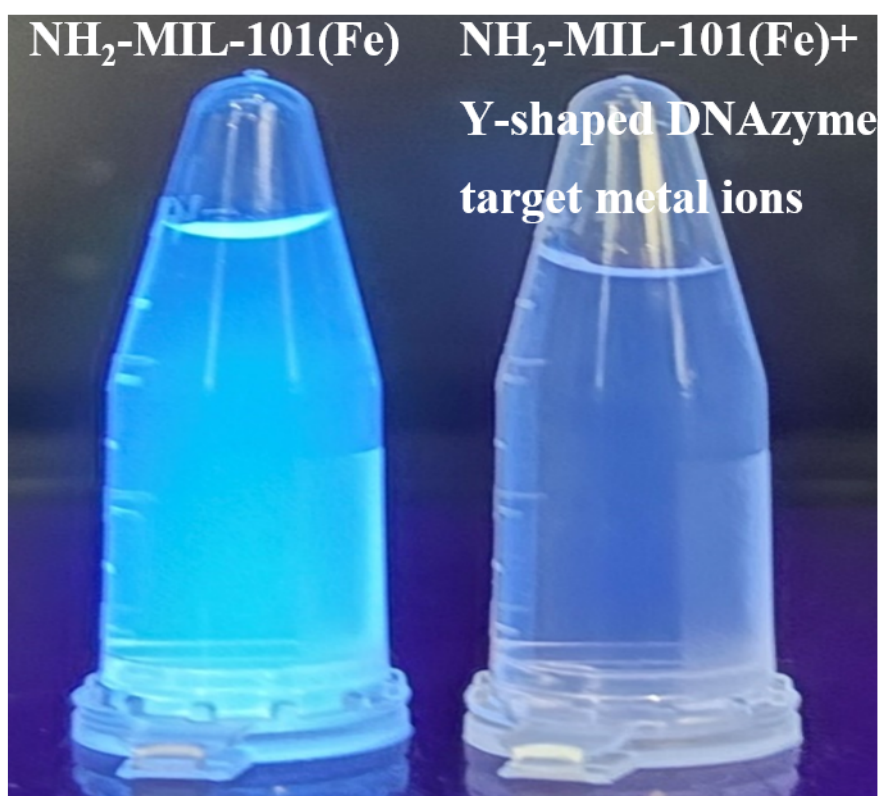



Figure S6. Photo images of without metal ions and with metal ions in NH<sub>2</sub>-MIL-101 (Fe)+Y-shaped DNAzyme.

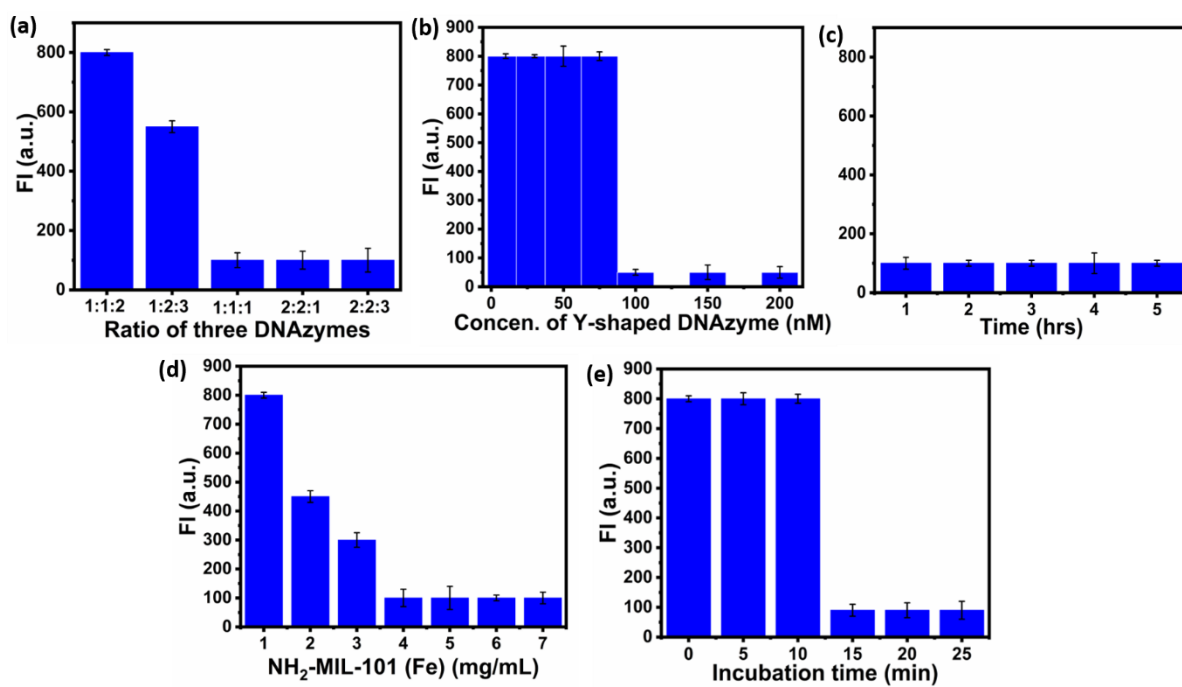

Figure S7. Optimization of reaction condition of NH<sub>2</sub>-MIL-101 (Fe) on fluorescence intensity. (a) Ratio of three DNAzyme; (b) Concentration of Y-shaped DNAzyme; (c) Stability for Y-shaped dNAzyme; (d) Concentrations of NH<sub>2</sub>-MIL-101 (Fe); (e) Incubation time. The error bars are standard deviations obtained from three independent measurements.

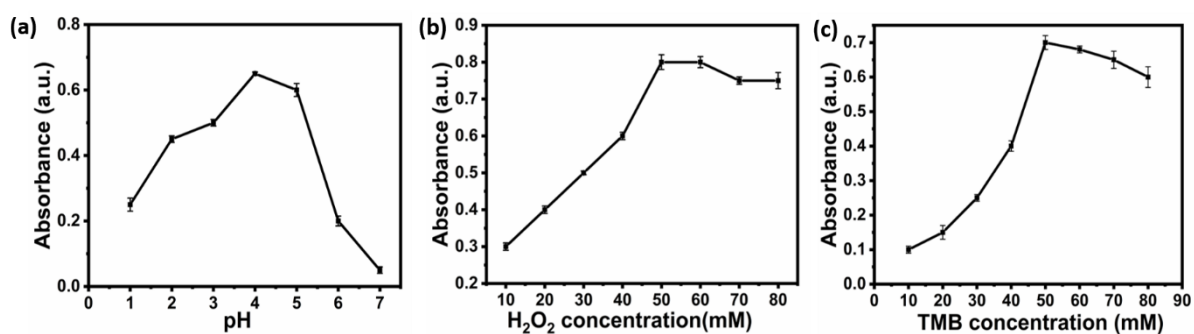

**Figure S8.** Optimization of reaction condition of peroxidase like activity of NH<sub>2</sub>-MIL-101 (Fe). (a) Effect of reaction pH; (b) H<sub>2</sub>O<sub>2</sub> concentration; (c) and TMB concentration.

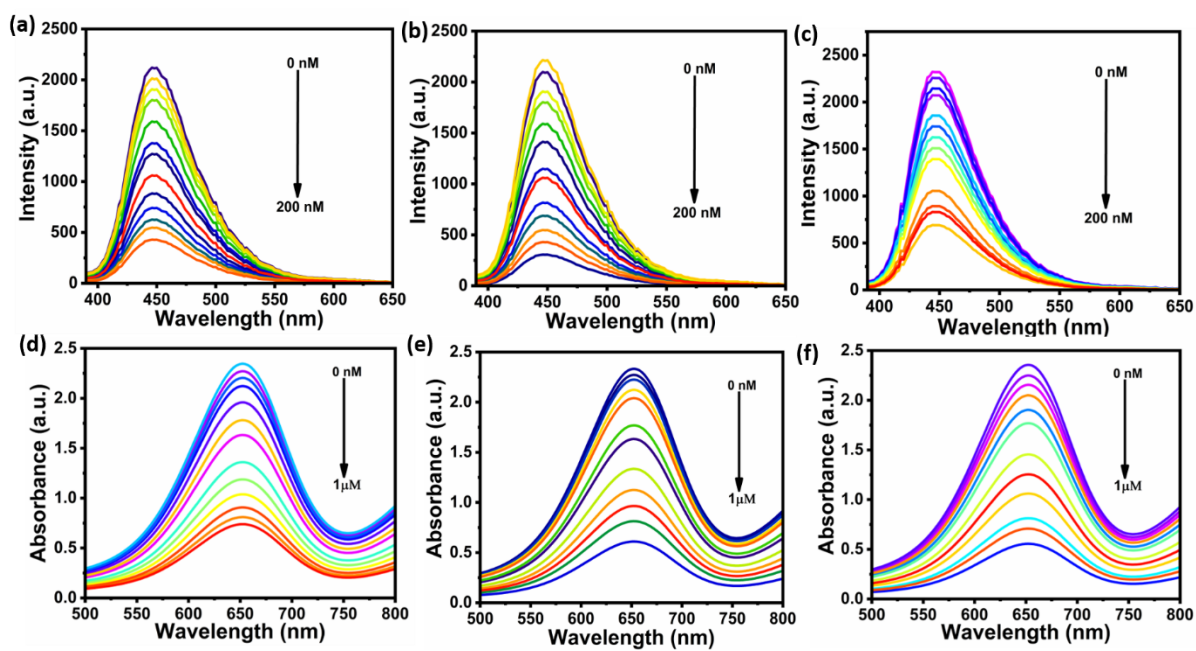

Figure S9. (a, b, c) Fluorescence spectra of NH<sub>2</sub>-MIL-101 (Fe) in the presence of different concentration of Pb<sup>2+</sup>, Hg<sup>2+</sup> and Cu<sup>2+</sup> ions. (d, e, f) Colorimetric spectra of NH<sub>2</sub>-MIL-101 (Fe) in the presence of different concentration of Pb<sup>2+</sup>, Hg<sup>2+</sup> and Cu<sup>2+</sup> ions.

**Table S1.** Comparison of the proposed method and the current dual-mode assays for detection of Pb<sup>2+</sup>, Hg<sup>2+</sup> and Cu<sup>2+</sup> ions.

| Metal ions                   | Methods                         | Materials                                | Linear range        | Detection limit | Ref.           |
|------------------------------|---------------------------------|------------------------------------------|---------------------|-----------------|----------------|
| Pb <sup>2+</sup>             | Fluorescence/<br>Colorimetry    | G-quadruplex-hemin complex               | 1.5-20 nM/0.5-10 nM | 1.29/0.16 nM    | 1              |
|                              | Electrochemical<br>/colorimetry | AuNCs@COFs                               | 0.01-5000/1-1000 nM | 7.9/560 nM      | 2              |
|                              | Fluorescence/<br>Colorimetry    | Rh6G                                     | 0.05-6/1-5 nM       | 20/25 nM        | 3              |
|                              | Fluorescence/<br>Colorimetry    | Ti <sub>3</sub> C <sub>2</sub> @PtPd NPs | 0.1-1/0.5-1 nM      | 23/74 nM        | 4              |
|                              | Fluorescence/<br>Colorimetry    | DNAzyme/NH <sub>2</sub> -MIL-101 (Fe)    | 0-200 nM            | 0.21/0.43 nM    | This work      |
|                              | Hg <sup>2+</sup>                | Fluorescence/<br>Colorimetry             | ZGO:Mn NRs          | 5 to 400 μM     | 0.215/0.225 μM |
| Fluorescence/<br>Colorimetry |                                 | R6G-NH <sub>2</sub>                      | 5-300/1-200 μM      | 1.5/5.1 μM      | 6              |

|                  |                                 |                                           |                        |                     |           |
|------------------|---------------------------------|-------------------------------------------|------------------------|---------------------|-----------|
|                  | Fluorescence/<br>Colorimetry    | CDs/AuNCs                                 | 0-130 nM               | 6.5/3.7 nM          | 7         |
|                  | Electrochemical/<br>Colorimetry | GO-AuNPs<br>Y-shaped                      | 10-60/0.001-60 $\mu$ M | 3.33 $\mu$ M        | 8         |
|                  | Fluorescence/<br>Colorimetry    | DNAzyme/NH <sub>2</sub> -<br>MIL-101 (Fe) | 0-200 nM               | 0.23/0.57 nM        | This work |
| Cu <sup>2+</sup> | Fluorescence/<br>Colorimetry    | N/S CDs                                   | 5 to 400 $\mu$ M       | 0.215/0.225 $\mu$ M | 9         |
|                  | Fluorescence/<br>Colorimetry    | GSH-AuNCs                                 | 1.0–10 $\mu$ M         | 0.547/0.458 $\mu$ M | 10        |
|                  | Fluorescence/<br>Colorimetry    | Peptide                                   | 0-60 $\mu$ M           | 1.42/2.64 nM        | 11        |
|                  | Fluorescence/<br>Colorimetry    | ZTM<br>Y-shaped                           | 0.1-5/5-50 $\mu$ M     | 5.61/4.96 nM        | 12        |
|                  | Fluorescence/<br>Colorimetry    | DNAzyme/NH <sub>2</sub> -<br>MIL-101 (Fe) | 0-200 nM               | 0.37/0.99 nM        | This work |

---

**Table S2.** Detection of Pb<sup>2+</sup>, Hg<sup>2+</sup> and Cu<sup>2+</sup> ions added in real samples (n = 3).

| Metal ions  | Dual mode sensor | Recovery (%) |      | RSD (%) |       |       |      |     |
|-------------|------------------|--------------|------|---------|-------|-------|------|-----|
|             |                  | FL           | CL   | FL      | CL    |       |      |     |
| Lake water  | Pb <sup>2+</sup> | 1            | 1.02 | 1       | 102   | 100   | 2.4  | 2.2 |
|             |                  | 2            | 1.98 | 2.02    | 99    | 101   | 5.5  | 2.7 |
|             |                  | 3            | 2.9  | 3.12    | 96    | 104.  | 4.6  | 8.2 |
|             | Hg <sup>2+</sup> | 1            | 1.02 | 1.03    | 102   | 103   | 5    | 5.6 |
|             |                  | 2            | 2.1  | 1.91    | 105   | 95.5  | 3.4  | 4.3 |
|             |                  | 3            | 3.02 | 3.05    | 100.6 | 101   | 5.6  | 2.2 |
|             | Cu <sup>2+</sup> | 1            | 0.98 | 1.06    | 98    | 106   | 2.9  | 3.2 |
|             |                  | 2            | 2.05 | 2.14    | 102.5 | 107   | 1.1  | 3.7 |
|             |                  | 3            | 3.03 | 3.1     | 101   | 103   | 4.1  | 5.3 |
| River water | Pb <sup>2+</sup> | 1            | 1    | 0.99    | 100   | 99    | 2    | 1.2 |
|             |                  | 2            | 2.04 | 2.12    | 102   | 106   | 3.4  | 1.9 |
|             |                  | 3            | 2.93 | 2.95    | 97.6  | 98.3  | 3.7  | 2.2 |
|             | Hg <sup>2+</sup> | 1            | 1.07 | 1.01    | 107   | 101   | 4.2  | 4.6 |
|             |                  | 2            | 2    | 1.98    | 100   | 99    | 3.4  | 4.2 |
|             |                  | 3            | 2.97 | 3.08    | 99    | 102   | 2.1  | 3.2 |
|             | Cu <sup>2+</sup> | 1            | 0.99 | 1.06    | 99    | 106   | 1.35 | 2.9 |
|             |                  | 2            | 1.9  | 2.05    | 95    | 102.5 | 8.9  | 1.1 |

---

**REFERENCES**

1. T. Ye, H. Chen, L. Bai, M. Yuan, H. Cao, L. Hao, X. Wu, F. Yin, F. Xu, *Spectrochimica Acta Part A: Molecular and Biomolecular Spectroscopy*, 2024, **309**, 123807.
2. L. Li, W. Zhao, Y. Wang, X. Liu, P. Jiang, L. Luo, T. You, *Journal of Hazardous Materials*, 2023, **457**, 131558.
3. X. Xie, M. Pan, L. Hong, K. Liu, J. Yang, S. Wang, S. Wang, *J Agric Food Chem.* <https://doi.org/10.1021/acs.jafc.1c02568>.
4. Z. Suo, L. Zhang, Z. Zhang, R. Liang, H. Shen, X. Chen, Y. Liu, M. Wei, B. He, H. Jin, *Food Chemistry*, 2024, **12**, 141845.
5. M. Zhang, H. Yin, L. Wan, H. Gao, S. Liu, Y. Liu, *Carbon Letters*, 2024, **11**, 1-10.
6. Z. Li, S. Liang, C. Zhang, L. Zhou, F. Luo, Z. Lou, Z. Chen, X. Zhang, M. Yang, *Microchimica Acta*, 2024, **191(7)**, 423.
7. Y. An, L. Li, L. Li, Y. Sun, B. Li, P. Wang, *J. Hazard. Mater.*, 2024, **465**, 133192.
8. J. Hou, J. Pei, Y. Kairong, B. Tong, Z. Shuang, L. Longwen, W. Li, *ACS Appl. Mater. & Interfaces*, 2022, **14 (11)**, 13848-13857.
9. Y. Gao, J. Zhang, J. Guo, Z. Shao, Y. Ming, L. He, Q. Chen, K. Zhang, *Microchemical Journal*, 2024, **200**, 110492.
10. J. Chen, C. Zhang, L. Yi, F. Duan, Y. Gu, K. Ge, X. Fan, *Food Chemistry: X*, 2024, 101958.
11. H. Cai, Y. Shao, L. Yan, H. Yu, Q. Hu, Y. Wang, X. Tu, *Analytical Methods*, 2024, **11**, 45-49.
12. Q. Diao, Z. Bu, R. Feng, X. Chen, J. Liu, Z. Tang, H. Liang, Q. Tian, S. Li, X. Niu, *Sensors and Actuators B: Chemical*, 2025, **422**, 136598.
